# Supplementary material
Source: Springer Nature journal article supplement (https://mijn.bsl.nl/resource/supplementary/13047_2011_354_MOESM1_ESM.pdf/7111586)
Supplement: MOESM1 [file 7111586]

## **Focus group questions:**

**In your opinion, what is Patient Education?**

**What type of education/information do you give?**

Prompts

- with regards content
- with regards topics
- general 'vs' foot specific
- 

**When would you typically provide this education/information?**

Prompts

- Timing: at diagnosis? Every consultation? Established disease?
- Appropriate timing of delivery?

**How is patient education/information provided? (mode of delivery)**

Prompts

- Verbal 'vs' written
- Patient support groups and the use of websites
- Group 'vs' individual
- Visual aids

**What are your perceived barriers to the provision of patient education/information?**

Prompts

- Patients' health behaviours and concordance
- Practitioner roles and education
- Finances
